# Supplementary material for: Improving visible light photocatalytic activity of NaNbO3: a DFT based investigation
Source: Royal Society of Chemistry journal article supplement (doi:10.1039/c6ra15024a), 2016-01-01
Supplement: c6ra15024a1.pdf [file c6ra15024a1.pdf]

## Supporting Materials

### Improving Visible Light Photocatalytic Activity of NaNbO<sub>3</sub>: A DFT based Investigation

Brindaban Modak,<sup>1,2</sup> Pampa Modak<sup>3</sup> and Swapan K. Ghosh<sup>1,2,4\*</sup>

<sup>1</sup>Theoretical Chemistry Section, Bhabha Atomic Research Centre, Mumbai – 400 085, India

<sup>2</sup>Homi Bhabha National Institute, Mumbai – 400 094, India

<sup>3</sup>Radiological Safety Division, Atomic Energy Regulatory Board, Mumbai-400094, India

<sup>4</sup>UM-DAE Centre of Excellence in Basic Sciences, Kalina Campus, Mumbai-400098, India

*Email: skghosh@barc.gov.in*

*Phone: 91-22-25595092*

*Fax: 91-22-25505151*

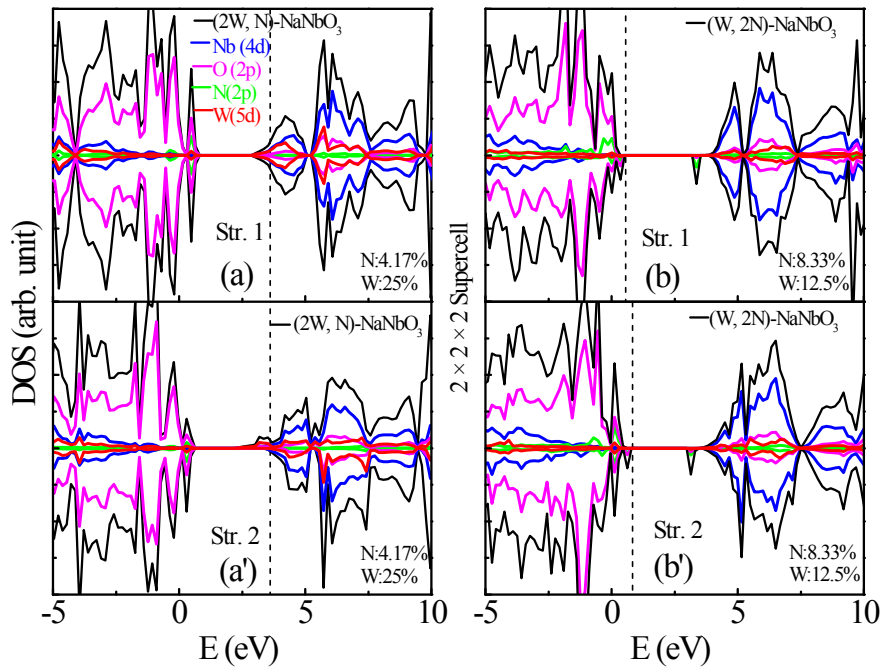

**Fig. S1:** Density of states of (W, N)-codoped  $\text{NaNbO}_3$  with different ratio of W and N calculated using  $2 \times 2 \times 2$  supercell.

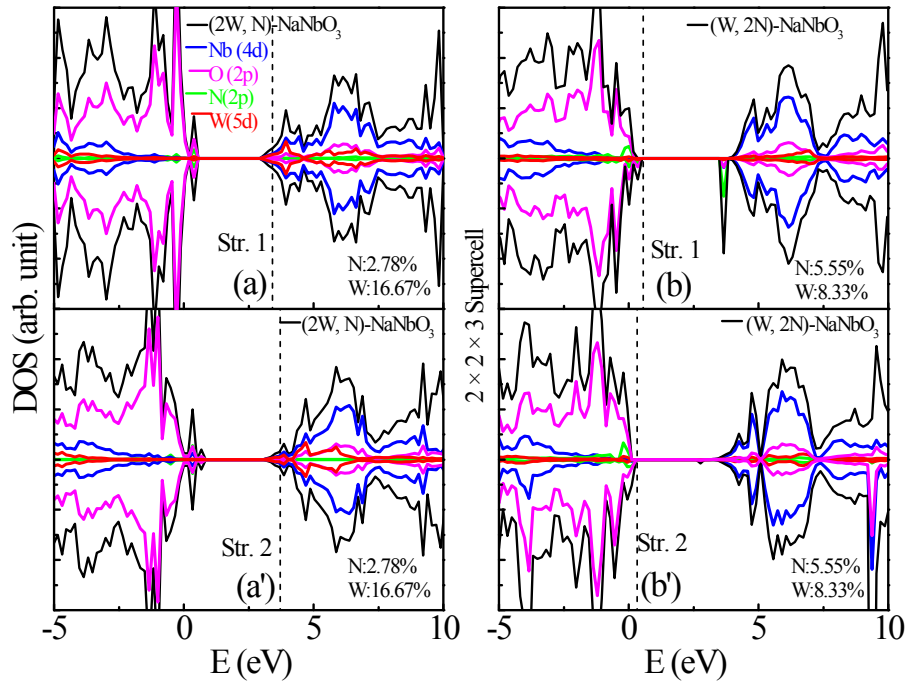

**Fig. S2:** Density of states of (W, N)-codoped  $\text{NaNbO}_3$  with different ratio of W and N calculated using  $2 \times 2 \times 3$  supercell.

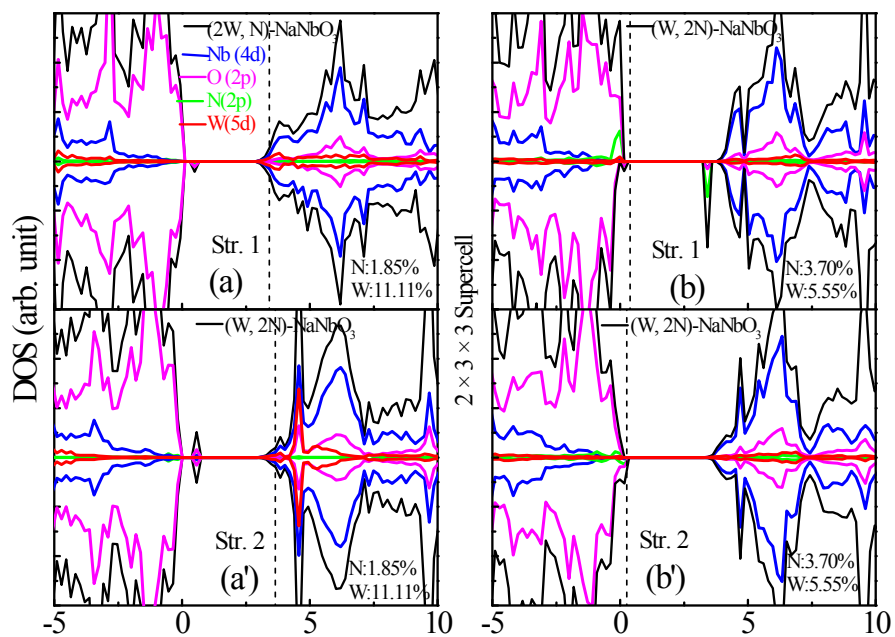

**Fig. S3:** Density of states of (W, N)-codoped  $\text{NaNbO}_3$  with different ratio of W and N calculated using  $2 \times 3 \times 3$  supercell.
